# Supplementary material for: Associations between the dietary inflammatory index and urinary incontinence among women younger than 65 years
Source: PubMed Central journal article supplement (PMC8084978; doi:10.1038/s41598-021-88833-0), 2021-04-29
Supplement: 41598_2021_88833_MOESM1_ESM.pdf [file 41598_2021_88833_MOESM1_ESM.pdf]

**Associations between the Dietary Inflammatory Index and Urinary Incontinence among Women  
younger than 65 years**

Shiyu Zhang<sup>1\*</sup>, Haiyang Bian<sup>2\*</sup>, Shi Qiu<sup>1,3\*</sup>, Boyu Cai<sup>1</sup>, Kun Jin<sup>1</sup>, Xiaonan Zheng<sup>1</sup>, Jiakun Li<sup>1</sup>, Xiang Tu<sup>1</sup>, Jianzhong Ai<sup>1</sup>, Lu Yang<sup>1#</sup>, Qiang Wei<sup>1#</sup>

\*These authors have contributed equally to this work

1.Department of Urology, Institute of Urology and National Clinical Research Center for Geriatrics, West China Hospital of Sichuan University, Chengdu, Sichuan Province, China

2.Peking University School of Public Health, Institute of Reproductive and Child Health and Department of Epidemiology and Biostatistics, Beijing, China.

3.Center of Biomedical big data, West China Hospital, Sichuan University, Chengdu, Sichuan Province, China

#Correspondence to:

Prof. Qiang Wei, Department of Urology, Institute of Urology, West China Hospital of Sichuan University, No. 37, Guoxue Alley, Chengdu, Sichuan, P.R. China; Post Code: 610041; weiqiang163163@163.com, telephone: +86 18980601425

Prof. Lu Yang, Department of Urology, Institute of Urology, West China Hospital of Sichuan University, No. 37, Guoxue Alley, Chengdu, Sichuan, P.R. China; Post Code: 610041; wycleflue@163.com, telephone: +86 13541235213

Supplementary Figure S1. NHANES 1999-2016 analytic sample flow chart.

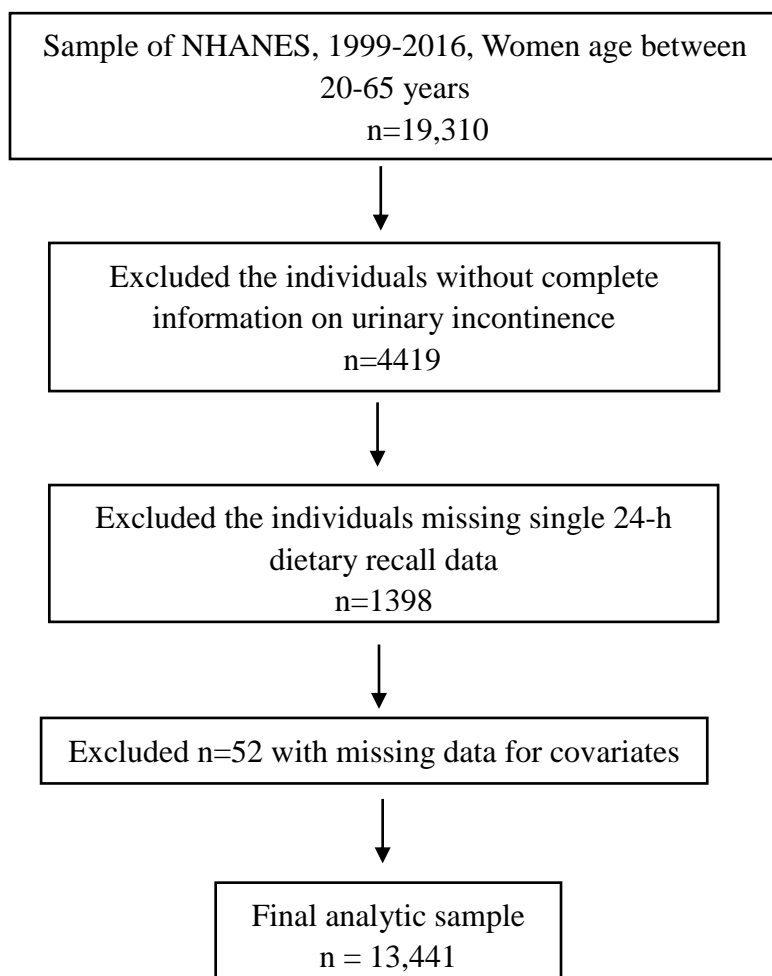

Supplementary Table S1. Baseline population characteristics according to dietary inflammatory index quartiles, National Health and Nutrition Examination Survey (NHANES), 1999–2016 (n=13,441)

| characteristics                | Frequency (%) or Mean $\pm$ SD  |                                |                                |                                | P-value |
|--------------------------------|---------------------------------|--------------------------------|--------------------------------|--------------------------------|---------|
|                                | Quartile1(n=3360)<br>-4.81-0.61 | Quartile2(n=3360)<br>0.61-2.11 | Quartile3(n=3360)<br>2.11-3.27 | Quartile4(n=3361)<br>3.27-5.33 |         |
| Age(years)                     | 43.26 $\pm$ 12.67               | 42.67 $\pm$ 12.95              | 42.08 $\pm$ 13.01              | 41.89 $\pm$ 13.29              | <0.001  |
| Energy (kcal)                  | 2405.95 $\pm$ 873.16            | 1996.88 $\pm$ 650.71           | 1712.70 $\pm$ 555.62           | 1300.37 $\pm$ 547.48           | <0.001  |
| Race                           |                                 |                                |                                |                                | <0.001  |
| Mexican American               | 663 (19.73%)                    | 661 (19.67%)                   | 569 (16.93%)                   | 523 (15.56%)                   |         |
| Other Hispanic                 | 305 (9.08%)                     | 325 (9.67%)                    | 315 (9.38%)                    | 302 (8.99%)                    |         |
| Non-Hispanic White             | 1437 (42.77%)                   | 1359 (40.45%)                  | 1427 (42.47%)                  | 1421 (42.28%)                  |         |
| Non-Hispanic Black             | 571 (16.99%)                    | 715 (21.28%)                   | 818 (24.35%)                   | 913 (27.16%)                   |         |
| Other Race                     | 384 (11.43%)                    | 300 (8.93%)                    | 231 (6.88%)                    | 202 (6.01%)                    |         |
| PIR                            |                                 |                                |                                |                                | <0.001  |
| <1.3                           | 831 (24.73%)                    | 908 (27.02%)                   | 1027 (30.57%)                  | 1253 (37.28%)                  |         |
| 1.3-3.5                        | 1232 (36.67%)                   | 1386 (41.25%)                  | 1372 (40.83%)                  | 1357 (40.37%)                  |         |
| >3.5                           | 1297 (38.60%)                   | 1066 (31.73%)                  | 961 (28.60%)                   | 751 (22.34%)                   |         |
| Education level                |                                 |                                |                                |                                | <0.001  |
| Less than high school          | 590 (17.56%)                    | 740 (22.02%)                   | 768 (22.86%)                   | 905 (26.93%)                   |         |
| High school or GED             | 572 (17.02%)                    | 698 (20.77%)                   | 808 (24.05%)                   | 880 (26.18%)                   |         |
| Above high school              | 2198 (65.42%)                   | 1922 (57.20%)                  | 1784 (53.10%)                  | 1576 (46.89%)                  |         |
| Marital status                 |                                 |                                |                                |                                | <0.001  |
| Married or living with partner | 2225 (66.22%)                   | 2158 (64.23%)                  | 2086 (62.08%)                  | 1933 (57.51%)                  |         |
| Living alone                   | 1135 (33.78%)                   | 1202 (35.77%)                  | 1274 (37.92%)                  | 1428 (42.49%)                  |         |
| BMI (kg/m <sup>2</sup> )       |                                 |                                |                                |                                | <0.001  |
| <25                            | 1221 (36.34%)                   | 1049 (31.22%)                  | 983 (29.26%)                   | 948 (28.21%)                   |         |
| >=25, <30                      | 899 (26.76%)                    | 951 (28.30%)                   | 955 (28.42%)                   | 923 (27.46%)                   |         |
| >=30                           | 1240 (36.90%)                   | 1360 (40.48%)                  | 1422 (42.32%)                  | 1490 (44.33%)                  |         |
| CVD risk score                 |                                 |                                |                                |                                | <0.001  |
| 0                              | 2360 (70.24%)                   | 2216 (65.95%)                  | 2214 (65.89%)                  | 2175 (64.71%)                  |         |

## Supplementary Material

|                                                  |               |               |               |               |        |
|--------------------------------------------------|---------------|---------------|---------------|---------------|--------|
| 1                                                | 670 (19.94%)  | 753 (22.41%)  | 726 (21.61%)  | 742 (22.08%)  |        |
| 2-5                                              | 330 (9.82%)   | 391 (11.64%)  | 420 (12.50%)  | 444 (13.21%)  |        |
| Alcohol intake<br>per week                       |               |               |               |               | <0.001 |
| never                                            | 446 (13.27%)  | 471 (14.02%)  | 551 (16.40%)  | 620 (18.45%)  |        |
| Up to once                                       | 2292 (68.21%) | 2395 (71.28%) | 2340 (69.64%) | 2445 (72.75%) |        |
| 2-3 times                                        | 370 (11.01%)  | 303 (9.02%)   | 330 (9.82%)   | 197 (5.86%)   |        |
| 4-6 times                                        | 168 (5.00%)   | 126 (3.75%)   | 87 (2.59%)    | 57 (1.70%)    |        |
| Daily or more                                    | 84 (2.50%)    | 65 (1.93%)    | 52 (1.55%)    | 42 (1.25%)    |        |
| Physical<br>activity                             |               |               |               |               | <0.001 |
| Less than<br>moderate                            | 1321 (39.32%) | 1561 (46.46%) | 1637 (48.72%) | 1826 (54.33%) |        |
| Moderate                                         | 506 (15.06%)  | 602 (17.92%)  | 567 (16.88%)  | 565 (16.81%)  |        |
| Vigorous                                         | 1533 (45.62%) | 1197 (35.62%) | 1156 (34.40%) | 970 (28.86%)  |        |
| Menopause                                        |               |               |               |               | 0.008  |
| no                                               | 2514 (74.82%) | 2474 (73.63%) | 2487 (74.02%) | 2396 (71.29%) |        |
| yes                                              | 846 (25.18%)  | 886 (26.37%)  | 873 (25.98%)  | 965 (28.71%)  |        |
| Smoked at<br>least 100<br>cigarettes<br>lifetime |               |               |               |               | <0.001 |
| no                                               | 2262 (67.32%) | 2194 (65.30%) | 2027 (60.33%) | 1870 (55.64%) |        |
| Yes                                              | 1098 (32.68%) | 1166 (34.70%) | 1333 (39.67%) | 1491 (44.36%) |        |
| Deliveries                                       | 1.91 ± 1.54   | 2.01 ± 1.60   | 2.05 ± 1.62   | 2.15 ± 1.66   | <0.001 |
| UUI                                              |               |               |               |               | 0.293  |
| no                                               | 2589 (77.05%) | 2555 (76.04%) | 2543 (75.68%) | 2524 (75.10%) |        |
| yes                                              | 771 (22.95%)  | 805 (23.96%)  | 817 (24.32%)  | 837 (24.90%)  |        |
| SUI                                              |               |               |               |               | <0.001 |
| no                                               | 1985 (59.08%) | 2005 (59.67%) | 2033 (60.51%) | 2142 (63.73%) |        |
| yes                                              | 1375 (40.92%) | 1355 (40.33%) | 1327 (39.49%) | 1219 (36.27%) |        |
| MUI                                              |               |               |               |               | 0.914  |
| no                                               | 2864 (85.24%) | 2854 (84.94%) | 2843 (84.61%) | 2852 (84.86%) |        |
| yes                                              | 496 (14.76%)  | 506 (15.06%)  | 517 (15.39%)  | 509 (15.14%)  |        |

Abbreviations: BMI, Body Mass Index; UUI, Urge Urinary Incontinence; SUI, stress urinary incontinence; MUI, mixed urinary incontinence; GED, General educational development; PIR, Poverty Income Ratio; CVD, cardiovascular disease.

Supplemental table 1. Effect size of DII on UUI in prespecified and exploratory subgroups

| characteristics | NO. of participants | OR (95%CI) | P for interaction |
|-----------------|---------------------|------------|-------------------|
|-----------------|---------------------|------------|-------------------|

## Supplementary Material

|                                            |      |                   |       |
|--------------------------------------------|------|-------------------|-------|
| Age (year)                                 |      |                   | 0.357 |
| <40                                        | 5628 | 1.00 (0.96, 1.04) |       |
| 40-65                                      | 7813 | 1.02 (0.99, 1.05) |       |
| Race                                       |      |                   | 0.524 |
| Mexican American                           | 2416 | 1.02 (0.96, 1.08) |       |
| Other Hispanic                             | 1247 | 1.07 (0.98, 1.15) |       |
| Non-Hispanic White                         | 5644 | 1.05 (1.01, 1.09) |       |
| Non-Hispanic Black                         | 3017 | 1.01 (0.97, 1.06) |       |
| Other Race                                 | 1117 | 0.99 (0.91, 1.07) |       |
| Energy(Kcal)                               |      |                   | 0.66  |
| low                                        | 6718 | 1.01 (0.97, 1.05) |       |
| High                                       | 6723 | 1.02 (0.99, 1.05) |       |
| BMI                                        |      |                   | 0.128 |
| <25                                        | 4201 | 1.06 (1.01, 1.12) |       |
| 25-30                                      | 3728 | 1.05 (1.00, 1.10) |       |
| ≥30                                        | 5512 | 1.01 (0.97, 1.05) |       |
| Menopause                                  |      |                   | 0.085 |
| no                                         | 9871 | 1.02 (0.99, 1.05) |       |
| yes                                        | 3570 | 1.06 (1.02, 1.11) |       |
| Alcohol intake per week                    |      |                   | 0.012 |
| never                                      | 2088 | 0.98 (0.92, 1.03) |       |
| Up to once                                 | 9472 | 1.03 (1.00, 1.06) |       |
| 2-3 times                                  | 1200 | 1.13 (1.04, 1.23) |       |
| 4-6 times                                  | 438  | 1.14 (1.01, 1.28) |       |
| daily or more                              | 243  | 1.14 (0.97, 1.33) |       |
| CVD risk score                             |      |                   | 0.335 |
| 0                                          | 8965 | 1.04 (1.01, 1.08) |       |
| 1                                          | 2891 | 1.04 (0.99, 1.10) |       |
| 2-5                                        | 1585 | 0.99 (0.93, 1.05) |       |
| Physical activity                          |      |                   | 0.601 |
| Less than moderate                         | 6345 | 1.04 (1.01, 1.08) |       |
| Moderate                                   | 2240 | 1.01 (0.95, 1.07) |       |
| Vigorous                                   | 4856 | 1.04 (0.99, 1.08) |       |
| Smoked at least 100<br>cigarettes lifetime |      |                   | 0.173 |
| no                                         | 8353 | 1.02 (0.99, 1.06) |       |
| yes                                        | 5088 | 1.06 (1.01, 1.10) |       |
| PIR                                        |      |                   | 0.992 |
| <1.3                                       | 4019 | 1.04 (0.99, 1.08) |       |
| 1.3-3.5                                    | 5347 | 1.03 (0.99, 1.08) |       |
| ≥3.5                                       | 4075 | 1.04 (0.99, 1.08) |       |
| Education                                  |      |                   | 0.320 |
| Less than high school                      | 3003 | 1.07 (1.01, 1.12) |       |
| High school or GED                         | 2958 | 1.04 (0.99, 1.10) |       |

Supplementary Material

---

|                                |      |                   |       |
|--------------------------------|------|-------------------|-------|
| Above high school              | 7480 | 1.02 (0.99, 1.06) |       |
| Marital status                 |      |                   | 0.491 |
| Married or living with partner | 8402 | 1.04 (1.01, 1.08) |       |
| Living alone                   | 5039 | 1.03 (0.99, 1.07) |       |
| Deliveries                     |      |                   | 0.738 |
| <2                             | 4912 | 1.03 (0.99, 1.08) |       |
| ≥ 2                            | 8529 | 1.04 (1.00, 1.07) |       |

---

Above model adjusted for age (Smooth); Race; Energy (Smooth); BMI; menopause; alcohol intake per week; CVD risk score; physical activity; least 100 cigarettes; PIR ; education; Marital; deliveries (Smooth). In each case, the model is not adjusted for the stratification variable.

Supplementary table S2. Effect size of DII on UUI in prespecified and exploratory subgroups

| characteristics                         | NO. of participants | OR (95%CI)        | P for interaction |
|-----------------------------------------|---------------------|-------------------|-------------------|
| Age (year)                              |                     |                   | 0.357             |
| <40                                     | 5628                | 1.00 (0.96, 1.04) |                   |
| 40-65                                   | 7813                | 1.02 (0.99, 1.05) |                   |
| Race                                    |                     |                   | 0.524             |
| Mexican American                        | 2416                | 1.02 (0.96, 1.08) |                   |
| Other Hispanic                          | 1247                | 1.07 (0.98, 1.15) |                   |
| Non-Hispanic White                      | 5644                | 1.05 (1.01, 1.09) |                   |
| Non-Hispanic Black                      | 3017                | 1.01 (0.97, 1.06) |                   |
| Other Race                              | 1117                | 0.99 (0.91, 1.07) |                   |
| Energy(Kcal)                            |                     |                   | 0.66              |
| low                                     | 6718                | 1.01 (0.97, 1.05) |                   |
| High                                    | 6723                | 1.02 (0.99, 1.05) |                   |
| BMI                                     |                     |                   | 0.128             |
| <25                                     | 4201                | 1.06 (1.01, 1.12) |                   |
| 25-30                                   | 3728                | 1.05 (1.00, 1.10) |                   |
| ≥30                                     | 5512                | 1.01 (0.97, 1.05) |                   |
| Menopause                               |                     |                   | 0.085             |
| no                                      | 9871                | 1.02 (0.99, 1.05) |                   |
| yes                                     | 3570                | 1.06 (1.02, 1.11) |                   |
| Alcohol intake per week                 |                     |                   | 0.012             |
| never                                   | 2088                | 0.98 (0.92, 1.03) |                   |
| Up to once                              | 9472                | 1.03 (1.00, 1.06) |                   |
| 2-3 times                               | 1200                | 1.13 (1.04, 1.23) |                   |
| 4-6 times                               | 438                 | 1.14 (1.01, 1.28) |                   |
| daily or more                           | 243                 | 1.14 (0.97, 1.33) |                   |
| CVD risk score                          |                     |                   | 0.335             |
| 0                                       | 8965                | 1.04 (1.01, 1.08) |                   |
| 1                                       | 2891                | 1.04 (0.99, 1.10) |                   |
| 2-5                                     | 1585                | 0.99 (0.93, 1.05) |                   |
| Physical activity                       |                     |                   | 0.601             |
| Less than moderate                      | 6345                | 1.04 (1.01, 1.08) |                   |
| Moderate                                | 2240                | 1.01 (0.95, 1.07) |                   |
| Vigorous                                | 4856                | 1.04 (0.99, 1.08) |                   |
| Smoked at least 100 cigarettes lifetime |                     |                   | 0.173             |
| no                                      | 8353                | 1.02 (0.99, 1.06) |                   |
| yes                                     | 5088                | 1.06 (1.01, 1.10) |                   |
| PIR                                     |                     |                   | 0.992             |
| <1.3                                    | 4019                | 1.04 (0.99, 1.08) |                   |
| 1.3-3.5                                 | 5347                | 1.03 (0.99, 1.08) |                   |
| ≥3.5                                    | 4075                | 1.04 (0.99, 1.08) |                   |
| Education                               |                     |                   | 0.320             |

Supplementary Material

---

|                                |      |                   |       |
|--------------------------------|------|-------------------|-------|
| Less than high school          | 3003 | 1.07 (1.01, 1.12) |       |
| High school or GED             | 2958 | 1.04 (0.99, 1.10) |       |
| Above high school              | 7480 | 1.02 (0.99, 1.06) |       |
| Marital status                 |      |                   | 0.491 |
| Married or living with partner | 8402 | 1.04 (1.01, 1.08) |       |
| Living alone                   | 5039 | 1.03 (0.99, 1.07) |       |
| Deliveries                     |      |                   | 0.738 |
| <2                             | 4912 | 1.03 (0.99, 1.08) |       |
| $\geq 2$                       | 8529 | 1.04 (1.00, 1.07) |       |

---

Above model adjusted for age (Smooth); Race; Energy (Smooth); BMI; menopause; alcohol intake per week; CVD risk score; physical activity; least 100 cigarettes; PIR ; education; Marital; deliveries (Smooth). In each case, the model is not adjusted for the stratification variable.



Supplementary table S3. Effect size of DII on SUI in prespecified and exploratory subgroups

| characteristic                          | NO. of participants | OR (95%CI)        | P for interaction |
|-----------------------------------------|---------------------|-------------------|-------------------|
| Age (year)                              |                     |                   | 0.696             |
| <40                                     | 5628                | 1.02 (0.98, 1.06) |                   |
| 40-65                                   | 7813                | 1.01 (0.98, 1.04) |                   |
| Race                                    |                     |                   | 0.291             |
| Mexican American                        | 2416                | 1.00 (0.95, 1.05) |                   |
| Other Hispanic                          | 1247                | 0.97 (0.91, 1.04) |                   |
| Non-Hispanic White                      | 5644                | 1.05 (1.01, 1.08) |                   |
| Non-Hispanic Black                      | 3017                | 1.04 (0.99, 1.09) |                   |
| Other Race                              | 1117                | 1.03 (0.96, 1.10) |                   |
| Energy(Kcal)                            |                     |                   | 0.553             |
| low                                     | 6718                | 0.99 (0.96, 1.03) |                   |
| High                                    | 6723                | 1.01 (0.98, 1.04) |                   |
| BMI                                     |                     |                   | 0.335             |
| <25                                     | 4201                | 1.03 (0.99, 1.07) |                   |
| 25-30                                   | 3728                | 1.06 (1.02, 1.10) |                   |
| ≥30                                     | 5512                | 1.02 (0.99, 1.06) |                   |
| Menopause                               |                     |                   | 0.027             |
| no                                      | 9871                | 1.02 (0.99, 1.05) |                   |
| yes                                     | 3570                | 1.07 (1.03, 1.11) |                   |
| Alcohol intake per week                 |                     |                   | 0.33              |
| never                                   | 2088                | 1.02 (0.97, 1.07) |                   |
| Up to once                              | 9472                | 1.03 (1.00, 1.06) |                   |
| 2-3 times                               | 1200                | 1.10 (1.03, 1.17) |                   |
| 4-6 times                               | 438                 | 1.07 (0.96, 1.18) |                   |
| daily or more                           | 243                 | 1.08 (0.94, 1.25) |                   |
| CVD risk score                          |                     |                   | 0.172             |
| 0                                       | 8965                | 1.03 (1.00, 1.06) |                   |
| 1                                       | 2891                | 1.07 (1.02, 1.12) |                   |
| 2-5                                     | 1585                | 1.01 (0.95, 1.07) |                   |
| Physical activity                       |                     |                   | 0.046             |
| Less than moderate                      | 6345                | 1.01 (0.98, 1.05) |                   |
| Moderate                                | 2240                | 1.02 (0.97, 1.08) |                   |
| Vigorous                                | 4856                | 1.07 (1.03, 1.10) |                   |
| Smoked at least 100 cigarettes lifetime |                     |                   | 0.003             |
| no                                      | 8353                | 1.01 (0.98, 1.04) |                   |
| yes                                     | 5088                | 1.08 (1.04, 1.11) |                   |
| PIR                                     |                     |                   | 0.652             |
| <1.3                                    | 4019                | 1.05 (1.01, 1.09) |                   |
| 1.3-3.5                                 | 5347                | 1.03 (0.99, 1.07) |                   |
| ≥3.5                                    | 4075                | 1.03 (0.99, 1.07) |                   |
| Education                               |                     |                   | 0.915             |

Supplementary Material

---

|                                |      |                   |       |
|--------------------------------|------|-------------------|-------|
| Less than high school          | 3003 | 1.04 (0.99, 1.09) |       |
| High school or GED             | 2958 | 1.04 (0.99, 1.09) |       |
| Above high school              | 7480 | 1.03 (1.00, 1.06) |       |
| Marital status                 |      |                   | 0.835 |
| Married or living with partner | 8402 | 1.03 (1.00, 1.06) |       |
| Living alone                   | 5039 | 1.04 (1.00, 1.08) |       |
| Deliveries                     |      |                   | 0.413 |
| <2                             | 4912 | 1.05 (1.01, 1.09) |       |
| $\geq 2$                       | 8529 | 1.03 (1.00, 1.06) |       |

---

Above model adjusted for age (Smooth); Race; Energy (Smooth); BMI; menopause; alcohol intake per week; CVD risk score; physical activity; least 100 cigarettes; PIR ; education; Marital; deliveries (Smooth). In each case, the model is not adjusted for the stratification variable.

Supplementary table S4. Effect size of DII on MUI in prespecified and exploratory subgroups

| characteristic                          | NO. of participants | OR (95%CI)        | P for interaction |
|-----------------------------------------|---------------------|-------------------|-------------------|
| Age (year)                              |                     |                   | 0.413             |
| <40                                     | 5628                | 1.00 (0.95, 1.06) |                   |
| 40-65                                   | 7813                | 1.03 (0.99, 1.07) |                   |
| Race                                    |                     |                   | 0.47              |
| Mexican American                        | 2416                | 1.02 (0.96, 1.09) |                   |
| Other Hispanic                          | 1247                | 1.05 (0.96, 1.16) |                   |
| Non-Hispanic White                      | 5644                | 1.06 (1.01, 1.11) |                   |
| Non-Hispanic Black                      | 3017                | 1.01 (0.95, 1.07) |                   |
| Other Race                              | 1117                | 0.98 (0.89, 1.08) |                   |
| Energy(Kcal)                            |                     |                   | 0.88              |
| low                                     | 6718                | 1.01 (0.96, 1.06) |                   |
| High                                    | 6723                | 1.00 (0.97, 1.04) |                   |
| BMI                                     |                     |                   | 0.656             |
| <25                                     | 4201                | 1.05 (0.99, 1.12) |                   |
| 25-30                                   | 3728                | 1.05 (0.99, 1.11) |                   |
| ≥30                                     | 5512                | 1.02 (0.98, 1.07) |                   |
| Menopause                               |                     |                   | 0.146             |
| no                                      | 9871                | 1.02 (0.98, 1.06) |                   |
| yes                                     | 3570                | 1.07 (1.02, 1.12) |                   |
| Alcohol intake per week                 |                     |                   | 0.022             |
| never                                   | 2088                | 0.99 (0.92, 1.05) |                   |
| Up to once                              | 9472                | 1.03 (0.99, 1.07) |                   |
| 2-3 times                               | 1200                | 1.16 (1.05, 1.28) |                   |
| 4-6 times                               | 438                 | 1.18 (1.02, 1.37) |                   |
| daily or more                           | 243                 | 1.09 (0.90, 1.31) |                   |
| CVD risk score                          |                     |                   | 0.359             |
| 0                                       | 8965                | 1.04 (0.99, 1.08) |                   |
| 1                                       | 2891                | 1.07 (1.01, 1.13) |                   |
| 2-5                                     | 1585                | 1.01 (0.94, 1.08) |                   |
| Physical activity                       |                     |                   | 0.555             |
| Less than moderate                      | 6345                | 1.03 (0.99, 1.08) |                   |
| Moderate                                | 2240                | 1.01 (0.94, 1.09) |                   |
| Vigorous                                | 4856                | 1.06 (1.01, 1.11) |                   |
| Smoked at least 100 cigarettes lifetime |                     |                   | 0.011             |
| no                                      | 8353                | 1.01 (0.97, 1.05) |                   |
| yes                                     | 5088                | 1.08 (1.03, 1.13) |                   |
| PIR                                     |                     |                   | 0.63              |
| <1.3                                    | 4019                | 1.06 (1.00, 1.11) |                   |
| 1.3-3.5                                 | 5347                | 1.03 (0.98, 1.08) |                   |
| ≥3.5                                    | 4075                | 1.03 (0.97, 1.08) |                   |
| Education                               |                     |                   | 0.035             |

Supplementary Material

---

|                                |      |                   |       |
|--------------------------------|------|-------------------|-------|
| Less than high school          | 3003 | 1.07 (1.01, 1.14) |       |
| High school or GED             | 2958 | 1.09 (1.02, 1.16) |       |
| Above high school              | 7480 | 1.01 (0.97, 1.05) |       |
| Marital status                 |      |                   | 0.149 |
| Married or living with partner | 8402 | 1.06 (1.01, 1.10) |       |
| Living alone                   | 5039 | 1.01 (0.97, 1.06) |       |
| Deliveries                     |      |                   | 0.372 |
| <2                             | 4912 | 1.02 (0.96, 1.08) |       |
| $\geq 2$                       | 8529 | 1.05 (1.01, 1.09) |       |

---

Above model adjusted for age (Smooth); Race; Energy (Smooth); BMI; menopause; alcohol intake per week; CVD risk score; physical activity; least 100 cigarettes; PIR ; education; Marital; deliveries (Smooth). In each case, the model is not adjusted for the stratification variable.

STROBE Statement—Checklist of items that should be included in reports of *cross-sectional studies*

|                              | <b>Item No</b> | <b>Recommendation</b>                                                                                                                                                                             | <b>Page No</b>        |
|------------------------------|----------------|---------------------------------------------------------------------------------------------------------------------------------------------------------------------------------------------------|-----------------------|
| <b>Title and abstract</b>    | 1              | (a) Indicate the study's design with a commonly used term in the title or the abstract                                                                                                            | 1                     |
|                              |                | (b) Provide in the abstract an informative and balanced summary of what was done and what was found                                                                                               | 1                     |
| <b>Introduction</b>          |                |                                                                                                                                                                                                   |                       |
| Background/rationale         | 2              | Explain the scientific background and rationale for the investigation being reported                                                                                                              | 1-2                   |
| Objectives                   | 3              | State specific objectives, including any prespecified hypotheses                                                                                                                                  | 1-2                   |
| <b>Methods</b>               |                |                                                                                                                                                                                                   |                       |
| Study design                 | 4              | Present key elements of study design early in the paper                                                                                                                                           | 2                     |
| Setting                      | 5              | Describe the setting, locations, and relevant dates, including periods of recruitment, exposure, follow-up, and data collection                                                                   | 2                     |
| Participants                 | 6              | (a) Give the eligibility criteria, and the sources and methods of selection of participants                                                                                                       | 2                     |
| Variables                    | 7              | Clearly define all outcomes, exposures, predictors, potential confounders, and effect modifiers. Give diagnostic criteria, if applicable                                                          | 3                     |
| Data sources/<br>measurement | 8*             | For each variable of interest, give sources of data and details of methods of assessment (measurement). Describe comparability of assessment methods if there is more than one group              | 2                     |
| Bias                         | 9              | Describe any efforts to address potential sources of bias                                                                                                                                         | 2                     |
| Study size                   | 10             | Explain how the study size was arrived at                                                                                                                                                         | 2                     |
| Quantitative variables       | 11             | Explain how quantitative variables were handled in the analyses. If applicable, describe which groupings were chosen and why                                                                      | 2                     |
| Statistical methods          | 12             | (a) Describe all statistical methods, including those used to control for confounding                                                                                                             | 3                     |
|                              |                | (b) Describe any methods used to examine subgroups and interactions                                                                                                                               | 3                     |
|                              |                | (c) Explain how missing data were addressed                                                                                                                                                       | 3                     |
|                              |                | (d) If applicable, describe analytical methods taking account of sampling strategy                                                                                                                | 3                     |
|                              |                | (e) Describe any sensitivity analyses                                                                                                                                                             | 3                     |
| <b>Results</b>               |                |                                                                                                                                                                                                   |                       |
| Participants                 | 13*            | (a) Report numbers of individuals at each stage of study—eg numbers potentially eligible, examined for eligibility, confirmed eligible, included in the study, completing follow-up, and analysed | 4                     |
|                              |                | (b) Give reasons for non-participation at each stage                                                                                                                                              | 4                     |
|                              |                | (c) Consider use of a flow diagram                                                                                                                                                                | Supplemental Figure 1 |

|                          |     |                                                                                                                                                                                                              |     |
|--------------------------|-----|--------------------------------------------------------------------------------------------------------------------------------------------------------------------------------------------------------------|-----|
| Descriptive data         | 14* | (a) Give characteristics of study participants (eg demographic, clinical, social) and information on exposures and potential confounders                                                                     | 4   |
|                          |     | (b) Indicate number of participants with missing data for each variable of interest                                                                                                                          | 4   |
| Outcome data             | 15* | Report numbers of outcome events or summary measures                                                                                                                                                         | 4   |
| Main results             | 16  | (a) Give unadjusted estimates and, if applicable, confounder-adjusted estimates and their precision (eg, 95% confidence interval). Make clear which confounders were adjusted for and why they were included | 4   |
|                          |     | (b) Report category boundaries when continuous variables were categorized                                                                                                                                    | 4   |
|                          |     | (c) If relevant, consider translating estimates of relative risk into absolute risk for a meaningful time period                                                                                             | 4   |
| Other analyses           | 17  | Report other analyses done—eg analyses of subgroups and interactions, and sensitivity analyses                                                                                                               | 5   |
| <b>Discussion</b>        |     |                                                                                                                                                                                                              |     |
| Key results              | 18  | Summarise key results with reference to study objectives                                                                                                                                                     | 5   |
| Limitations              | 19  | Discuss limitations of the study, taking into account sources of potential bias or imprecision. Discuss both direction and magnitude of any potential bias                                                   | 6   |
| Interpretation           | 20  | Give a cautious overall interpretation of results considering objectives, limitations, multiplicity of analyses, results from similar studies, and other relevant evidence                                   | 5   |
| Generalisability         | 21  | Discuss the generalisability (external validity) of the study results                                                                                                                                        | 5-6 |
| <b>Other information</b> |     |                                                                                                                                                                                                              |     |
| Funding                  | 22  | Give the source of funding and the role of the funders for the present study and, if applicable, for the original study on which the present article is based                                                | 7   |
